# Supplementary material
Source: publisher figshare collection journal article supplement (https://brill.figshare.com/articles/dataset/_/25392583)
Supplement: Supplementary file 1 [file 1]

**New Miocene fossil taxa illuminate the evolution and  
paleobiogeography of the Ponto-Caspian gammaroid amphipod  
radiation**

*Denis Copilaş-Ciocianu* | ORCID: 0000-0002-6374-2365

Laboratory of Evolutionary Ecology of Hydrobionts, Nature Research Centre, 08412 Vilnius,  
Lithuania

*denis.copilas-ciocianu@gamtc.lt*

*Viorel Ionesi* | ORCID: 0000-0003-0122-3655

Department of Geology, Alexandru Ioan Cuza University of Iaşi, Iaşi 700506, Romania

**Supplementary material**

TABLE S1 List of taxa used in the phylogenetic analysis.

| <b>Family</b>   | <b>Species</b>                       | <b>Name in matrix</b>        | <b>Status</b>   |
|-----------------|--------------------------------------|------------------------------|-----------------|
| Behningiellidae | <i>Behningiella brachypus</i>        | Behningiellabrachypus        | extant          |
| Behningiellidae | <i>Cardiophilus baeri</i>            | Cardiophilusbaeri            | extant          |
| Behningiellidae | <i>Cardiophilus marisnigrae</i>      | Cardiophilusmarisnigrae      | extant          |
| Behningiellidae | <i>Zernovia volgensis</i>            | Zernoviavolgensis            | extant          |
| Caspicolidae    | <i>Caspicola knipovitschi</i>        | Caspicolaknipovitschi        | extant          |
| Gammaridae      | <i>Akerogammarus contiguus</i>       | Akerogammaruscontiguus       | extant          |
| Gammaridae      | <i>Akerogammarus knipowitschi</i>    | Akerogammarusknipowitschi    | extant          |
| Gammaridae      | <i>Amathillina affinis</i>           | Amathillinaaffinis           | extant          |
| Gammaridae      | <i>Amathillina cristata</i>          | Amathillinacristata          | extant          |
| Gammaridae      | <i>Amathillina maximowiczi</i>       | Amathillinamaximowiczi       | extant          |
| Gammaridae      | <i>Amathillina pusilla</i>           | Amathillinapusilla           | extant          |
| Gammaridae      | <i>Amathillina spinosa</i>           | Amathillinaspinosa           | extant          |
| Gammaridae      | <i>Axelboeckia spinosa</i>           | Axelboeckiaspinosa           | extant          |
| Gammaridae      | <i>Baku paradoxus</i>                | Bakuparadoxus                | extant          |
| Gammaridae      | <i>Cephalogammarus macrocephalus</i> | Cephalogammarusmacrocephalus | extant          |
| Gammaridae      | <i>Chaetogammarus hyrcanus</i>       | Chaetogammarushyrcanus       | extant          |
| Gammaridae      | <i>Chaetogammarus ischnus</i>        | Chaetogammarusischnus        | extant          |
| Gammaridae      | <i>Chaetogammarus trichiatus</i>     | Chaetogammarustrichiatus     | extant          |
| Gammaridae      | <i>Chaetogammarus pauxillus</i>      | Chaetogammaruspauxillus      | extant          |
| Gammaridae      | <i>Chaetogammarus placidus</i>       | Chaetogammarusplacidus       | extant          |
| Gammaridae      | <i>Chaetogammarus warpachowskyi</i>  | Chaetogammaruswarpachowskyi  | extant          |
| Gammaridae      | <i>Derzhavinella cava</i>            | Derzhavinellacava            | extant          |
| Gammaridae      | <i>Derzhavinella macrochelata</i>    | Derzhavinellamacrochelata    | extant          |
| Gammaridae      | <i>Dikerogammarus bispinosus</i>     | Dikerogammarusbispinosus     | extant          |
| Gammaridae      | <i>Dikerogammarus caspius</i>        | Dikerogammaruscaspus         | extant          |
| Gammaridae      | <i>Dikerogammarus gruberi</i>        | N/A                          | extant/excluded |
| Gammaridae      | <i>Dikerogammarus haemobaphes</i>    | Dikerogammarushaemobaphes    | extant          |
| Gammaridae      | <i>Dikerogammarus istanbulensis</i>  | Dikerogammarusistanbulensis  | extant          |
| Gammaridae      | <i>Dikerogammarus oskari</i>         | Dikerogammarusoskari         | extant          |
| Gammaridae      | <i>Dikerogammarus villosus</i>       | Dikerogammarusvillosus       | extant          |
| Gammaridae      | <i>Gmelina aestuarica</i>            | Gmelinaaestuarica            | extant          |

|                 |                                     |                             |        |
|-----------------|-------------------------------------|-----------------------------|--------|
| Gammaridae      | <i>Gmelina costata</i>              | Gmelinacostata              | extant |
| Gammaridae      | <i>Gmelinopsis aurita</i>           | Gmelinopsisaurita           | extant |
| Gammaridae      | <i>Gmelinopsis tuberculata</i>      | Gmelinopsistuberculata      | extant |
| Gammaridae      | <i>Kuzmelina kusnezowi</i>          | Kuzmelinakusnezowi          | extant |
| Gammaridae      | <i>Jugogammarus kusceri</i>         | Jugogammaruskusceri         | extant |
| Gammaridae      | <i>Litorogammarus dursi</i>         | Litorogammarusdursi         | extant |
| Gammaridae      | <i>Litorogammarus mazestiensis</i>  | Litorogammarusmazestiensis  | extant |
| Gammaridae      | <i>Litorogammarus karadagiensis</i> | Litorogammaruskaradagiensis | extant |
| Gammaridae      | <i>Lanceogammarus andrussowi</i>    | Lanceogammarusandrussowi    | extant |
| Gammaridae      | <i>Scytaelina simplex</i>           | Scytaelinasimplex           | extant |
| Gammaridae      | <i>Shablogammarus shablensis</i>    | Shablogammarusshablensis    | extant |
| Gammaridae      | <i>Sowinskya macrocera</i>          | Sowinskyamacrocera          | extant |
| Gammaridae      | <i>Spirogammarus major</i>          | Spirogammarusmajor          | extant |
| Gammaridae      | <i>Yogmelina brachyura</i>          | Yogmelinabrachyura          | extant |
| Gammaridae      | <i>Yogmelina laeviuscula</i>        | Yogmelinalaeviuscula        | extant |
| Gammaridae      | <i>Yogmelina limana</i>             | Yogmelinalimana             | extant |
| Gammaridae      | <i>Yogmelina pusilla</i>            | Yogmelinapusilla            | extant |
| Iphigenellidae  | <i>Iphigenella acanthopoda</i>      | Iphigenellaacanthopoda      | extant |
| Pontogammaridae | <i>Compactogammarus compactus</i>   | Compactogammaruscompactus   | extant |
| Pontogammaridae | <i>Niphargogammarus aequimanus</i>  | Niphargogammarusaequimanus  | extant |
| Pontogammaridae | <i>Niphargogammarus borodini</i>    | Niphargogammarusborodini    | extant |
| Pontogammaridae | <i>Niphargogammarus intermedius</i> | Niphargogammarusintermedius | extant |
| Pontogammaridae | <i>Niphargogammarus quadrimanus</i> | Niphargogammarusquadrimanus | extant |
| Pontogammaridae | <i>Niphargoides boltovskoyi</i>     | Niphargoidesboltovskoyi     | extant |
| Pontogammaridae | <i>Niphargoides caspius</i>         | Niphargoidescaspius         | extant |
| Pontogammaridae | <i>Niphargoides corpulentus</i>     | Niphargoidescorpulentus     | extant |
| Pontogammaridae | <i>Niphargoides grimmi</i>          | Niphargoidesgrimmi          | extant |
| Pontogammaridae | <i>Obesogammarus acuminatus</i>     | Obesogammarusacuminatus     | extant |
| Pontogammaridae | <i>Obesogammarus boeoticus</i>      | Obesogammarusboeoticus      | extant |
| Pontogammaridae | <i>Obesogammarus crassus</i>        | Obesogammaruscrassus        | extant |
| Pontogammaridae | <i>Obesogammarus obesus</i>         | Obesogammarusobesus         | extant |
| Pontogammaridae | <i>Obesogammarus platycheir</i>     | Obesogammarusplatycheir     | extant |
| Pontogammaridae | <i>Obesogammarus subnudus</i>       | Obesogammarussubnudus       | extant |
| Pontogammaridae | <i>Pandorites podoceroideis</i>     | Pandoritespodoceroideis     | extant |

|                 |                                       |                               |          |
|-----------------|---------------------------------------|-------------------------------|----------|
| Pontogammaridae | <i>Paraniphargoides derzhavini</i>    | Paraniphargoidesderzhavini    | extant   |
| Pontogammaridae | <i>Paraniphargoides motasi</i>        | Paraniphargoidesmotasi        | extant   |
| Pontogammaridae | <i>Pontogammarus abbreviatus</i>      | Pontogammarusabbreviatus      | extant   |
| Pontogammaridae | <i>Pontogammarus aestuarius</i>       | Pontogammarusaestuarius       | extant   |
| Pontogammaridae | <i>Pontogammarus borceae</i>          | Pontogammarusborceae          | extant   |
| Pontogammaridae | <i>Pontogammarus robustoides</i>      | Pontogammarusrobustoides      | extant   |
| Pontogammaridae | <i>Pontogammarus setosus</i>          | Pontogammarussetosus          | extant   |
| Pontogammaridae | <i>Pontogammarus maeoticus</i>        | Pontogammarusmaeoticus        | extant   |
| Pontogammaridae | <i>Pontogammarus sarsi</i>            | Pontogammarussarsi            | extant   |
| Pontogammaridae | <i>Pontogammarus weidemanni</i>       | Pontogammarusweidemanni       | extant   |
| Pontogammaridae | <i>Stenogammarus compressus</i>       | Stenogammaruscompressus       | extant   |
| Pontogammaridae | <i>Stenogammarus compressosimilis</i> | Stenogammaruscompressosimilis | extant   |
| Pontogammaridae | <i>Stenogammarus deminutus</i>        | Stenogammarusdeminutus        | extant   |
| Pontogammaridae | <i>Stenogammarus macrurus</i>         | Stenogammarusmacrurus         | extant   |
| Pontogammaridae | <i>Stenogammarus micrurus</i>         | Stenogammarusmicrurus         | extant   |
| Pontogammaridae | <i>Stenogammarus similis</i>          | Stenogammarussimilis          | extant   |
| Pontogammaridae | <i>Turcogammarus aralensis</i>        | Turcogammarusaralensis        | extant   |
| Pontogammaridae | <i>Turcogammarus spandli</i>          | Turcogammarusspandli          | extant   |
| Pontogammaridae | <i>Turcogammarus turcarum</i>         | Turcogammarusturcarum         | extant   |
| Pontogammaridae | <i>Uroniphargoides spinicaudatus</i>  | Uroniphargoidesspinicaudatus  | extant   |
| Pontogammaridae | <i>Wolgagammarus dzjubani</i>         | Wolgagammarusdzjubani         | extant   |
| Pontogammaridae | <i>Andrussovia bogacevi</i>           | Andrussoviabogacevi           | fossil   |
| Pontogammaridae | <i>Andrussovia sokolovi</i>           | Andrussoviasokolovi           | fossil   |
| Pontogammaridae | <i>Andrussovia vassoievitschi</i>     | Andrussoviavassoievitschi     | fossil   |
| Pontogammaridae | <i>Praegmelina andrussovi</i>         | Praegmelinaandrussovi         | fossil   |
| Pontogammaridae | <i>Praegmelina archangelskii</i>      | Praegmelinaarchangelskii      | fossil   |
| Pontogammaridae | <i>Eogmelina moldavica</i>            | Eogmelinamoldavica            | fossil   |
| Pontogammaridae | <i>Eogmelina prisca</i>               | Eogmelinaprisca               | fossil   |
| Gammaridae      | <i>Pectenogammarus oliviiiformis</i>  | Pectenogammarusolivii         | outgroup |

TABLE S2 List of morphological characters and their states used in the phylogenetic and phenetic analyses.

| No. | Character                                 | State                                                          |
|-----|-------------------------------------------|----------------------------------------------------------------|
| 1   | Rostrum                                   | (0) absent                                                     |
|     |                                           | (1) present                                                    |
| 2   | Head lateral protuberances                | (0) absent                                                     |
|     |                                           | (1) present                                                    |
| 3   | Anterior head lobes                       | (0) straight/rounded                                           |
|     |                                           | (1) mucronate                                                  |
|     |                                           | (2) strongly angled                                            |
| 4   | Eye shape                                 | (0) longer than broad                                          |
|     |                                           | (1) as long as broad                                           |
| 5   | Inferior antennal sinus depth             | (0) less deeper/subequal with depth of superior antennal sinus |
|     |                                           | (1) deeper than superior antennal sinus                        |
| 6   | A1 total length                           | (0) longer/subequal to head + first three pereonites           |
|     |                                           | (1) shorter than head + first three pereonites                 |
| 7   | A1 flagellum length                       | (0) longer than peduncle                                       |
|     |                                           | (1) shorter than peduncle                                      |
|     |                                           | (2) subequal to peduncle                                       |
| 8   | A1 peduncle 1st article length            | (0) shorter/subequal to articles 2+3 combined                  |
|     |                                           | (1) longer than articles 2+3 combined                          |
| 9   | A1 peduncle 2nd article ventral swelling  | (0) absent                                                     |
|     |                                           | (1) present                                                    |
| 10  | A1 accessory flagellum number of articles | (0) at least 3 articles                                        |
|     |                                           | (1) 2 articles                                                 |
|     |                                           | (2) 1 article                                                  |
| 11  | A1 accessory flagellum length             | (0) shorter than 0.5 of primary flagellum                      |
|     |                                           | (1) longer/subequal to 0.5 of primary flagellum                |
| 12  | A2 total length                           | (0) shorter than A1                                            |

|    |                                                       |                                                       |
|----|-------------------------------------------------------|-------------------------------------------------------|
|    |                                                       | (1) subequal/slightly longer than A1                  |
| 13 | A2 peduncular setae length                            | (0) shorter/subequal to peduncle diameter             |
|    |                                                       | (1) longer than peduncle diameter                     |
| 14 | A2 peduncular setae shape                             | (0) straight                                          |
|    |                                                       | (1) coiled                                            |
|    |                                                       | (2) straight + coiled                                 |
|    |                                                       | (3) curled                                            |
| 15 | A2 3rd peduncular article length                      | (0) shorter/subequal to 0.5 of the 4th segment length |
|    |                                                       | (1) longer than 0.5 of the 4th segment length         |
| 16 | A2 4th peduncular article ventral swelling            | (0) absent                                            |
|    |                                                       | (1) present                                           |
| 17 | A2 4th peduncular article width                       | (0) thinner/subequal to A1 1st article                |
|    |                                                       | (1) 2x broader than A1 1st article                    |
| 18 | A2 flagellum                                          | (0) longer/subequal than peduncle article 5           |
|    |                                                       | (1) shorter than peduncle article 5                   |
| 19 | Mandibular palp                                       | (0) normal                                            |
|    |                                                       | (1) reduced                                           |
| 20 | Mandibular palp basal article setation                | (0) absent                                            |
|    |                                                       | (1) present                                           |
| 21 | Mandibular palp 2nd article posterior margin setation | (0) absent                                            |
|    |                                                       | (1) present                                           |
| 22 | Mandibular palp distal article D setae                | (0) present                                           |
|    |                                                       | (1) absent                                            |
| 23 | Molar process                                         | (0) well developed, triturative                       |
|    |                                                       | (1) vestigial                                         |
| 24 | Maxilla I palp                                        | (0) normal                                            |
|    |                                                       | (1) reduced                                           |
| 25 | Maxilla I inner lobe                                  | (0) normal                                            |
|    |                                                       | (1) reduced                                           |
| 26 | Maxilliped palp                                       | (0) normal                                            |

|    |                                                                  |                                                   |
|----|------------------------------------------------------------------|---------------------------------------------------|
|    |                                                                  | (1) reduced                                       |
| 27 | Dorsal keel on pereonites<br>(single or double)                  | (0) absent                                        |
|    |                                                                  | (1) present                                       |
| 28 | Lateral tubercles on<br>pereonites                               | (0) absent                                        |
|    |                                                                  | (1) present                                       |
| 29 | Dorsal keel on pleonites                                         | (0) absent                                        |
|    |                                                                  | (1) present                                       |
| 30 | Lateral tubercles on pleonites                                   | (0) absent                                        |
|    |                                                                  | (1) present                                       |
| 31 | Coxal plates 1-4 setosity of<br>ventral margin                   | (0) short and sparse setae (<0.2 coxa depth)      |
|    |                                                                  | (1) long and dense (>0.2 coxa depth)              |
|    |                                                                  | (2) short and dense (<0.2 coxa depth)             |
|    |                                                                  | (3) long and sparse (>0.2 coxa depth)             |
| 32 | Coxal plate 1 height                                             | (0) taller than the corresponding tergal segment  |
|    |                                                                  | (1) shorter than the corresponding tergal segment |
|    |                                                                  | (2) subequal to corresponding tergal segment      |
| 33 | Coxal plate 1 anterior lobe                                      | (0) absent                                        |
|    |                                                                  | (1) present                                       |
| 34 | Coxal plate 4 shape                                              | (0) as deep as broad                              |
|    |                                                                  | (1) deeper than broad                             |
| 35 | Coxa 5 width                                                     | (0) shorter/subequal to length of P5 basis        |
|    |                                                                  | (1) longer than length of P5 basis                |
| 36 | Tergum 7 height                                                  | (0) < 2x taller than tergum 1 height              |
|    |                                                                  | (1) > 2x taller than tergum 1 height              |
| 37 | Propodus of G1 length<br>relative to G2 propodus<br>(males only) | (0) shorter                                       |
|    |                                                                  | (1) subequal                                      |
|    |                                                                  | (2) longer                                        |
| 38 | Palmar edge of G1 & 2<br>(males only)                            | (0) straight to slightly convex                   |
|    |                                                                  | (1) concave                                       |
| 39 |                                                                  | (0) shorter                                       |

|    |                                                           |                                                |
|----|-----------------------------------------------------------|------------------------------------------------|
|    | Propodus of G1 width relative to G2 propodus (males only) | (1) subequal                                   |
|    |                                                           | (2) longer                                     |
| 40 | Coiled setae on G1 & G2 propodus (males only)             | (0) absent                                     |
|    |                                                           | (1) present                                    |
| 41 | Medial palmar spine on G1 & G2 (males only)               | (0) present                                    |
|    |                                                           | (1) absent                                     |
| 42 | Palmar angle G1 (males only)                              | (0) $< 40^{\circ}$                             |
|    |                                                           | (1) $41-50^{\circ}$                            |
|    |                                                           | (2) $51-60^{\circ}$                            |
|    |                                                           | (3) $61-70^{\circ}$                            |
|    |                                                           | (4) $> 70^{\circ}$                             |
| 43 | Palmar length G1 (males only)                             | (0) shorter than diagonal                      |
|    |                                                           | (1) subequal to diagonal                       |
|    |                                                           | (2) longer than diagonal                       |
| 44 | Palmar angle G2 (males only)                              | (0) $< 40^{\circ}$                             |
|    |                                                           | (1) $41-50^{\circ}$                            |
|    |                                                           | (2) $51-60^{\circ}$                            |
|    |                                                           | (3) $61-70^{\circ}$                            |
|    |                                                           | (4) $> 70^{\circ}$                             |
| 45 | Palmar length G2 (males only)                             | (0) shorter than diagonal                      |
|    |                                                           | (1) subequal to diagonal                       |
|    |                                                           | (2) longer than diagonal                       |
| 46 | Coiled setae on P3 posterior margin                       | (0) absent                                     |
|    |                                                           | (1) present                                    |
| 47 | Posterior margin of P3 carpus and merus setae length      | (0) up to 2x longer than width of propodus     |
|    |                                                           | (1) more than 2x longer than width of propodus |
| 48 | Posterior margin of P3 carpus setal disposition           | (0) in clusters                                |
|    |                                                           | (1) continuous fan                             |
| 49 | Posterior margin of P3 merus setal disposition            | (0) up to 6 clusters                           |
|    |                                                           | (1) more than 6 clusters                       |



|    |                                                      |                                                             |
|----|------------------------------------------------------|-------------------------------------------------------------|
|    |                                                      | (2) continuous fan                                          |
| 50 | Posterior margin of P4 carpus and merus setae length | (0) up to 2x longer than width of propodus                  |
|    |                                                      | (1) more than 2x longer than width of propodus              |
| 51 | Posterior margin of P4 carpus setal disposition      | (0) in clusters                                             |
|    |                                                      | (1) continuous fan                                          |
| 52 | Posterior margin of P4 merus setal disposition       | (0) up to 6 clusters                                        |
|    |                                                      | (1) more than 6 clusters                                    |
|    |                                                      | (2) continuous fan                                          |
| 53 | P3-4 carpus width                                    | (0) similar to propodus                                     |
|    |                                                      | (1) at least twice broader than propodus                    |
| 54 | P5 basis height                                      | (0) greater/subequal to coxal plate 1 height                |
|    |                                                      | (1) shorter than coxal plate 1 height                       |
| 55 | P5 basis shape                                       | (0) longer than broad                                       |
|    |                                                      | (1) as long as broad                                        |
| 56 | P5 basis setae on inner surface                      | (0) absent                                                  |
|    |                                                      | (1) present                                                 |
| 57 | P5 basis anterior margin armature                    | (0) dominated by spines                                     |
|    |                                                      | (1) dominated by setae                                      |
|    |                                                      | (2) bare                                                    |
| 58 | P5 basis anterior margin setae length                | (0) absent                                                  |
|    |                                                      | (1) setae shorter than ischium width                        |
|    |                                                      | (2) setae subequal/longer than ischium width                |
| 59 | P5 basis posterior margin setation length            | (0) absent                                                  |
|    |                                                      | (1) setae shorter than ischium width                        |
|    |                                                      | (2) setae subequal/longer than ischium width                |
| 60 | P5 basis posterior margin setation density           | (0) sparse/absent                                           |
|    |                                                      | (1) dense                                                   |
| 61 | P6 basis shape                                       | (0) not expanded, posterior margin straight/slightly convex |

|    |                                            |                                                                                    |
|----|--------------------------------------------|------------------------------------------------------------------------------------|
|    |                                            | (1) expanded proximo-posteriorly, posterior margin concave                         |
|    |                                            | (2) expanded throughout, posterior margin convex, without downward projecting lobe |
|    |                                            | (3) expanded throughout, posterior margin convex, with downward projecting lobe    |
| 62 | P6 basis medial row of setal clusters      | (0) absent                                                                         |
|    |                                            | (1) present                                                                        |
| 63 | P6 basis anterior margin armature          | (0) dominated by spines                                                            |
|    |                                            | (1) dominated by setae                                                             |
|    |                                            | (2) bare                                                                           |
| 64 | P6 basis anterior margin setation length   | (0) absent                                                                         |
|    |                                            | (1) setae shorter than ischium width                                               |
|    |                                            | (2) setae subequal/longer than ischium width                                       |
| 65 | P6 basis posterior margin setation length  | (0) absent                                                                         |
|    |                                            | (1) setae shorter than ischium width                                               |
|    |                                            | (2) setae subequal/longer than ischium width                                       |
| 66 | P6 basis posterior margin setation density | (0) sparse/absent                                                                  |
|    |                                            | (1) dense                                                                          |
| 67 | P7 length                                  | (0) > 40% body length                                                              |
|    |                                            | (1) < 40% body length                                                              |
| 68 | P7 basis length                            | (0) < height of pleosomite 1                                                       |
|    |                                            | (1) > height of pleosomite 1                                                       |
| 69 | P7 basis shape                             | (0) not expanded in the distal half, posterior margin straight/slightly convex     |
|    |                                            | (1) partially expanded distally, posterior margin convex                           |
|    |                                            | (2) expanded throughout, posterior margin convex, without downward projecting lobe |
|    |                                            | (3) expanded throughout, posterior margin convex, with downward projecting lobe    |

|    |                                                  |                                                                           |
|----|--------------------------------------------------|---------------------------------------------------------------------------|
| 70 | P7 basis medial row of setal clusters            | (0) absent                                                                |
|    |                                                  | (1) present                                                               |
| 71 | P7 basis anterior margin armature                | (0) dominated by spines                                                   |
|    |                                                  | (1) dominated by setae                                                    |
|    |                                                  | (2) bare                                                                  |
| 72 | P7 basis anterior margin setation length         | (0) absent                                                                |
|    |                                                  | (1) setae shorter than ischium width                                      |
|    |                                                  | (2) setae subequal/longer than ischium width                              |
| 73 | P7 basis posterior margin setation length        | (0) absent                                                                |
|    |                                                  | (1) setae shorter than ischium width                                      |
|    |                                                  | (2) setae subequal/longer than ischium width                              |
| 74 | P7 basis posterior margin setation density       | (0) sparse/absent                                                         |
|    |                                                  | (1) dense                                                                 |
| 75 | Overall setation on P5-7 meri, carpi and propodi | (0) poorly developed, setae shorter than underlying segment width         |
|    |                                                  | (1) well developed, setae as long as/longer than underlying segment width |
| 76 | P5-7 dactylus shape                              | (0) strong and curved                                                     |
|    |                                                  | (1) slender and relatively straight                                       |
| 77 | P5-7 propodus length                             | (0) subequal to carpus                                                    |
|    |                                                  | (1) at least 50% longer than carpus                                       |
| 78 | P5-7 merus shape                                 | (0) normal, not posteriorly expanded                                      |
|    |                                                  | (1) expanded into a posterior lobe                                        |
| 79 | Epimere 2 setal clusters on outer surface        | (0) absent                                                                |
|    |                                                  | (1) present                                                               |
| 80 | Epimere 2 armature distal edge                   | (0) spines                                                                |
|    |                                                  | (1) setae                                                                 |
|    |                                                  | (2) bare                                                                  |
|    |                                                  | (3) spines + setae                                                        |
| 81 |                                                  | (0) straight/mucronated                                                   |

|    |                                     |                                                                    |
|----|-------------------------------------|--------------------------------------------------------------------|
|    | Epimere 2 postero-inferior corner   | (1) acute                                                          |
| 82 | Epimere 3 postero-inferior corner   | (0) straight/mucronated                                            |
|    |                                     | (1) acute                                                          |
| 83 | Epimere 3 armature distal edge      | (0) spines                                                         |
|    |                                     | (1) setae                                                          |
|    |                                     | (2) bare                                                           |
|    |                                     | (3) spines + setae                                                 |
| 84 | Epimere 3 disto-posterior setal fan | (0) absent                                                         |
|    |                                     | (1) present                                                        |
| 85 | Urosomite 1 length                  | (0) shorter/equal with combined length of urosomites 2 and 3       |
|    |                                     | (1) longer than combined length of urosomites 2 and 3              |
| 86 | Urosomite 1 armature                | (0) 2 latero-dorsal and 2-3 dorsal groups of elements (2, 2, 2, 2) |
|    |                                     | (1) 2 latero-dorsal and 1 dorsal group (2, 2, 2)                   |
|    |                                     | (2) 1 dorsal group                                                 |
|    |                                     | (3) absent                                                         |
| 87 | Urosomite 1 dorsal shape            | (0) flat                                                           |
|    |                                     | (1) humped                                                         |
|    |                                     | (2) prominent tubercle                                             |
| 88 | Urosomite 1 lateral tubercles       | (0) absent                                                         |
|    |                                     | (1) present                                                        |
| 89 | Urosomite 2 armature                | (0) 2 latero-dorsal and 2-3 dorsal groups of elements (2, 2, 2, 2) |
|    |                                     | (1) 2 latero-dorsal and 1 dorsal group (1, 1, 1)                   |
|    |                                     | (2) 1 dorsal group                                                 |
|    |                                     | (3) absent                                                         |
| 90 | Urosomite 2 dorsal shape            | (0) flat                                                           |
|    |                                     | (1) humped                                                         |

|     |                                              |                                                                  |
|-----|----------------------------------------------|------------------------------------------------------------------|
|     |                                              | (2) prominent tubercle                                           |
| 91  | Urosomite 3 armature                         | (0) 2 latero-dorsal and 2 dorsal groups of elements (2, 2, 2, 2) |
|     |                                              | (1) 2 latero-dorsal and 1 dorsal group (1, 1, 1)                 |
|     |                                              | (2) 2 latero-dorsal groups (absent dorsal group)                 |
|     |                                              | (3) absent                                                       |
|     |                                              | (4) 1 dorsal group                                               |
| 92  | Urosomite 3 dorsal shape                     | (0) flat                                                         |
|     |                                              | (1) humped                                                       |
| 93  | Uropod 1 peduncle marginal spines            | (0) at least 2 spines for any given margin                       |
|     |                                              | (1) 0-1 spines for any given margin                              |
| 94  | Uropod 1 rami length                         | (0) shorter than peduncle                                        |
|     |                                              | (1) subequal to peduncle                                         |
|     |                                              | (2) longer than peduncle                                         |
| 95  | Uropod 1 rami marginal spines                | (0) at least 2 spines for any given ramus                        |
|     |                                              | (1) 0-1 spines for any given ramus                               |
| 96  | Uropod 3 overall length                      | (0) extends beyond the distal tip of U1                          |
|     |                                              | (1) does not extend beyond the distal tip of U1                  |
| 97  | Uropod 3 1st exopod article length           | (0) longer than peduncle                                         |
|     |                                              | (1) subequal to peduncle                                         |
| 98  | Uropod 3 1st exopod article shape            | (0) rod-like, width at distal end > 50% width at proximal end    |
|     |                                              | (1) lanceolate, width at distal end < 50% width at proximal end  |
| 99  | Uropod 3 1st exopod article general armature | (0) dominated by spines                                          |
|     |                                              | (1) dominated by setae                                           |
|     |                                              | (2) mixed – outer edge armed with spines, inner edge with setae  |
| 100 | Uropod 3 1st exopod article setal patterns   | (0) arranged in tufts                                            |
|     |                                              | (1) forming a continuous fan                                     |

|     |                                                      |                                                                    |
|-----|------------------------------------------------------|--------------------------------------------------------------------|
| 101 | Uropod 3 1st exopod article spine/setae length ratio | (0) spines as long as/longer than the accompanying setae           |
|     |                                                      | (1) spines shorter than the accompanying setae                     |
|     |                                                      | (2) spines absent                                                  |
| 102 | Uropod 3 1st exopod article setae length             | (0) shorter/subequal to exopod width                               |
|     |                                                      | (1) longer than exopod width                                       |
| 103 | Uropod 3 exopod terminal article shape               | (0) longer than broad                                              |
|     |                                                      | (1) as long as broad                                               |
|     |                                                      | (2) absent                                                         |
| 104 | Uropod 3 exopod terminal article setation            | (0) absent/1-2 isolated setae shorter than article length          |
|     |                                                      | (1) well developed with setae longer than article length           |
| 105 | Uropod 3 endopod length                              | (0) shorter/subequal to 0.3 of exopod 1st article                  |
|     |                                                      | (1) longer than 0.3 of exopod 1st article                          |
|     |                                                      | (2) absent                                                         |
| 106 | Uropod 3 endopod armature                            | (0) apical spines/setae                                            |
|     |                                                      | (1) well developed setal fan on inner edge and apically            |
| 107 | Uropod 3 overall setae types                         | (0) simple                                                         |
|     |                                                      | (1) simple + plumose                                               |
| 108 | Telson length                                        | (0) does not/very little extends beyond distal edge of U3 peduncle |
|     |                                                      | (1) extends well beyond distal edge of U3 peduncle                 |
| 109 | Telson proportions                                   | (0) broader than long                                              |
|     |                                                      | (1) as long as broad                                               |
|     |                                                      | (2) longer than broad                                              |
| 110 | Telson lobes shape                                   | (0) triangular, inner and outer margins straight/slightly convex   |
|     |                                                      | (1) triangular, inner and outer margins strongly convex            |
|     |                                                      | (2) rectangular, inner and outer margins straight                  |
|     |                                                      | (3) inner margin straight, outer margin convex                     |
| 111 |                                                      | (0) present                                                        |

|     |                                                        |                                     |
|-----|--------------------------------------------------------|-------------------------------------|
|     | Lateral submedian spines on outer edge of telson lobes | (1) absent                          |
| 112 | Number of distal spines per telson lobe                | (0) 2-3                             |
|     |                                                        | (1) 1                               |
|     |                                                        | (2) >3                              |
|     |                                                        | (3) absent                          |
| 113 | Placement of distal spines/setae on telson lobes       | (0) terminal                        |
|     |                                                        | (1) subterminal                     |
|     |                                                        | (2) terminal + subterminal          |
| 114 | Distal setae on telson lobes                           | (0) shorter than 50% of lobe length |
|     |                                                        | (1) longer than 50% of lobe length  |
|     |                                                        | (2) absent                          |
